# Supplementary material for: In situ growth of ZIF-8 nanocrystals on layered double hydroxide nanosheets for enhanced CO2 capture
Source: Royal Society of Chemistry journal article supplement (doi:10.1039/c6dt02083f), 2016-01-01
Supplement: c6dt02083f1.pdf [file c6dt02083f1.pdf]

## SUPPORTING INFORMATION

### ***In situ* growth of ZIF-8 nanocrystals on layered double hydroxide nanosheets for enhanced CO<sub>2</sub> capture**

Peng-Fei Liu,<sup>a</sup> Kai Tao,<sup>\*,a</sup> Guo-Chang Li,<sup>a</sup> Meng-Ke Wu,<sup>a</sup> Shuai-Ru Zhu,<sup>a</sup> Fei-Yan Yi,<sup>a</sup> Wen-Na Zhao<sup>b</sup> and Lei Han<sup>\*,a,c</sup>

<sup>a</sup> State Key Laboratory Base of Novel Functional Materials and Preparation Science, School of Materials Science & Chemical Engineering, Ningbo University, Ningbo, Zhejiang 315211, China

<sup>B</sup> Key Laboratory for Molecular Design and Nutrition Engineering of Ningbo, Ningbo Institute of Technology, Zhejiang University, Ningbo, Zhejiang 315100, China

<sup>C</sup> Key Laboratory of Photoelectric Materials and Devices of Zhejiang Province, Ningbo University, Ningbo, Zhejiang 315211, China

\* E-mail: hanlei@nbu.edu.cn; taokai@nbu.edu.cn

#### **Experimental Section**

##### **1、 Synthesis of composite nanosheet**

###### *Preparation of Zn–Al layered double hydroxide*

Zn-Al LDH was prepared by a modified homogeneous precipitation method, using urea as the ammonia releasing reagent. In a typical synthesis, an aqueous solution (100 mL) of Zn and Al nitrates (Zn : Al molar ratio equals to 2 : 1) with a total metal ion concentration of 0.15 mol/L in the final solution was added into a round bottom flask. Subsequently, the aqueous solution of urea (three times the [Al<sup>3+</sup>]) was added carefully. The white mixture was heated up to 100 °C with vigorous stirring under reflux conditions in inert atmosphere for 48 hours. *Preparation of Zn-Al LDH@ZIF-8 composite nanosheet*

Zn-Al LDH@ZIF-8 composite nanosheet was prepared by *in situ* growth of ZIF-8 on Zn-Al LDH. In a typical procedure, 0.245g of 2-methylimidazole and 0.135g of HCOONa were dissolved in 40 mL methanol in a beaker. Then, 0.12g of Zn-Al LDH was added to the above solution. The mixture was mechanically stirred at

room temperature for several minutes before transferring to the Teflon-lined stainless steel autoclave followed by heating at 100°C for 2 hours. The product was collected by centrifugation and washed by methanol three times. The sample was then dried in a vacuum oven at 150°C for 4 h prior to further analysis.

## 2、 Characterization.

Scanning electron microscopy (SEM) images were taken on Hitachi TM-4000. X-ray diffraction (XRD) patterns were recorded on a Bruker D8 diffractometer using Cu K $\alpha$  radiation. The nitrogen adsorption measurements of pore size and surface area were made at 77 K using an ASAP 2020 M apparatus. Before each measurement, the sample was outgassed at 473 K for 2 h under vacuum. CO<sub>2</sub> uptake was also measured on the ASAP 2020 M apparatus at atmospheric pressure (1 bar). Prior to uptake measurements, the sample was outgassed at 473 K for 2 h under vacuum.

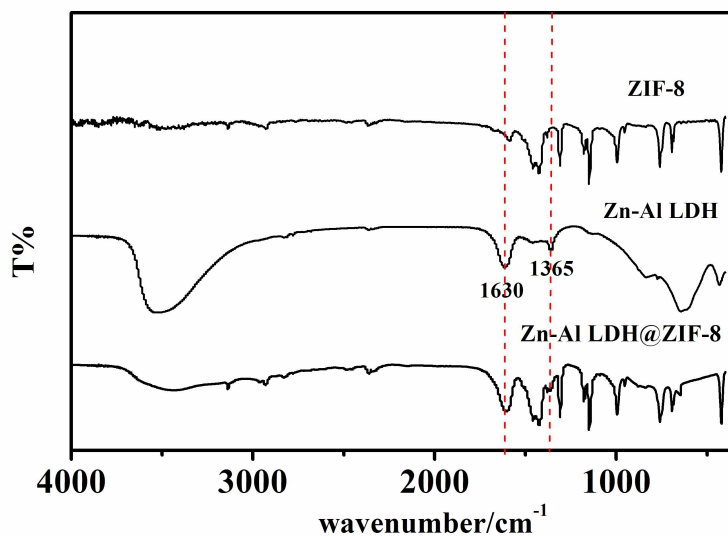

**Figure S1.** FT-IR spectra of ZIF-8, Zn-Al LDH and Zn-Al LDH@ZIF-8.

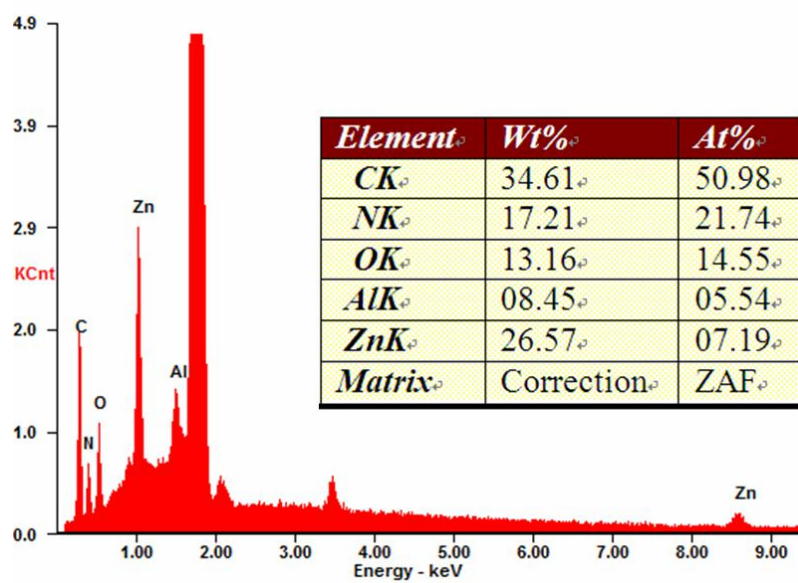

**Figure S2.** EDX spectrum of the Zn-Al LDH@ZIF-8.

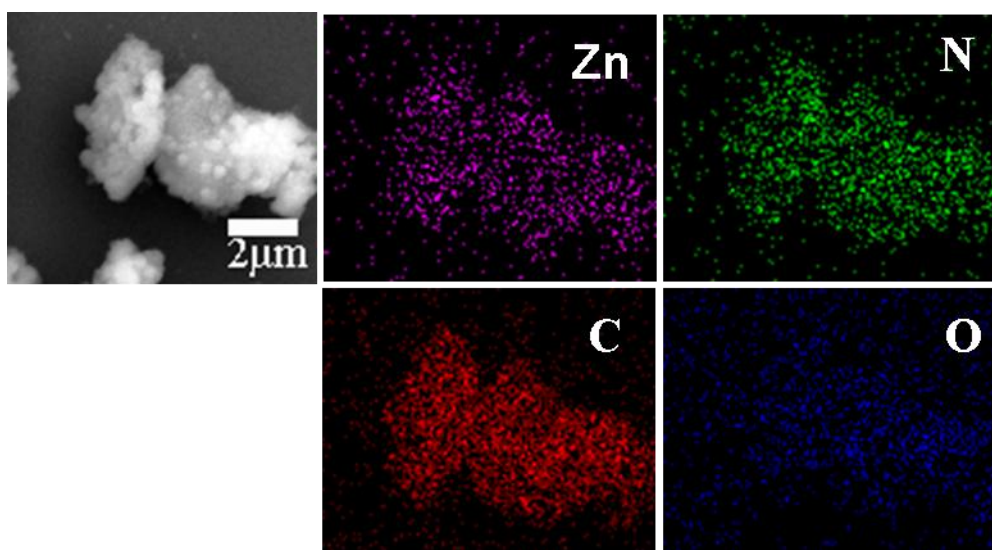

**Figure S3.** The EDX mapping of Zn-Al LDH@ZIF-8.

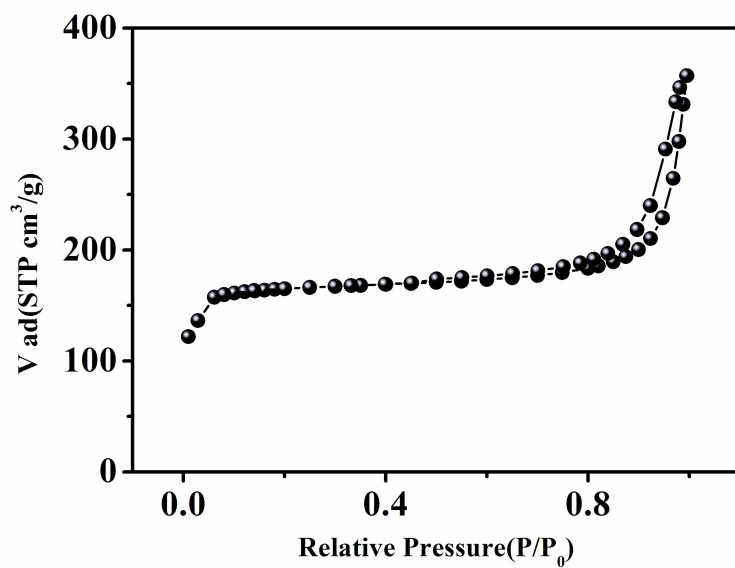

**Figure S4.** Nitrogen adsorption-desorption isotherms of Zn-Al LDH.

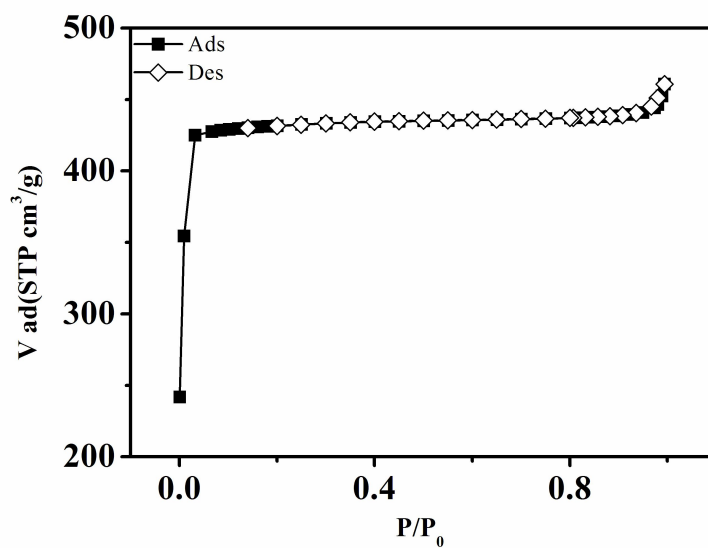

**Figure S5.** Nitrogen adsorption-desorption isotherms of ZIF-8.

**Table S1.** The comparison of ZIF-8, Zn-Al LDH and Zn-Al LDH@ZIF-8.

| Sample                                                     | Zn-Al LDH@ZIF-8 | Zn-Al LDH | ZIF-8 |
|------------------------------------------------------------|-----------------|-----------|-------|
| BET surface ( $\text{m}^2\cdot\text{g}^{-1}$ )             | 1136.87         | 556.32    | 1460  |
| $\text{CO}_2$ sorption ( $\text{mmol}\cdot\text{g}^{-1}$ ) | 1.0             | 0.1       | 0.65  |
